# Supplementary material for: Simultaneous characterization of protein–material and cell–protein interactions using dynamic QCM-D analysis on SAM surfaces
Source: Royal Society of Chemistry journal article supplement (doi:10.1039/c5bm00613a), 2016-01-01
Supplement: c5bm00613a1.pdf [file c5bm00613a1.pdf]

## Supplementary Information

“Simultaneous Characterizations of Protein-Material and Cell-Protein Interactions

Using Dynamic QCM-D Analysis on SAM Surfaces”

Keiichiro Kushiro, Chih-Hao Lee, Madoka Takai

### Supplementary Figures

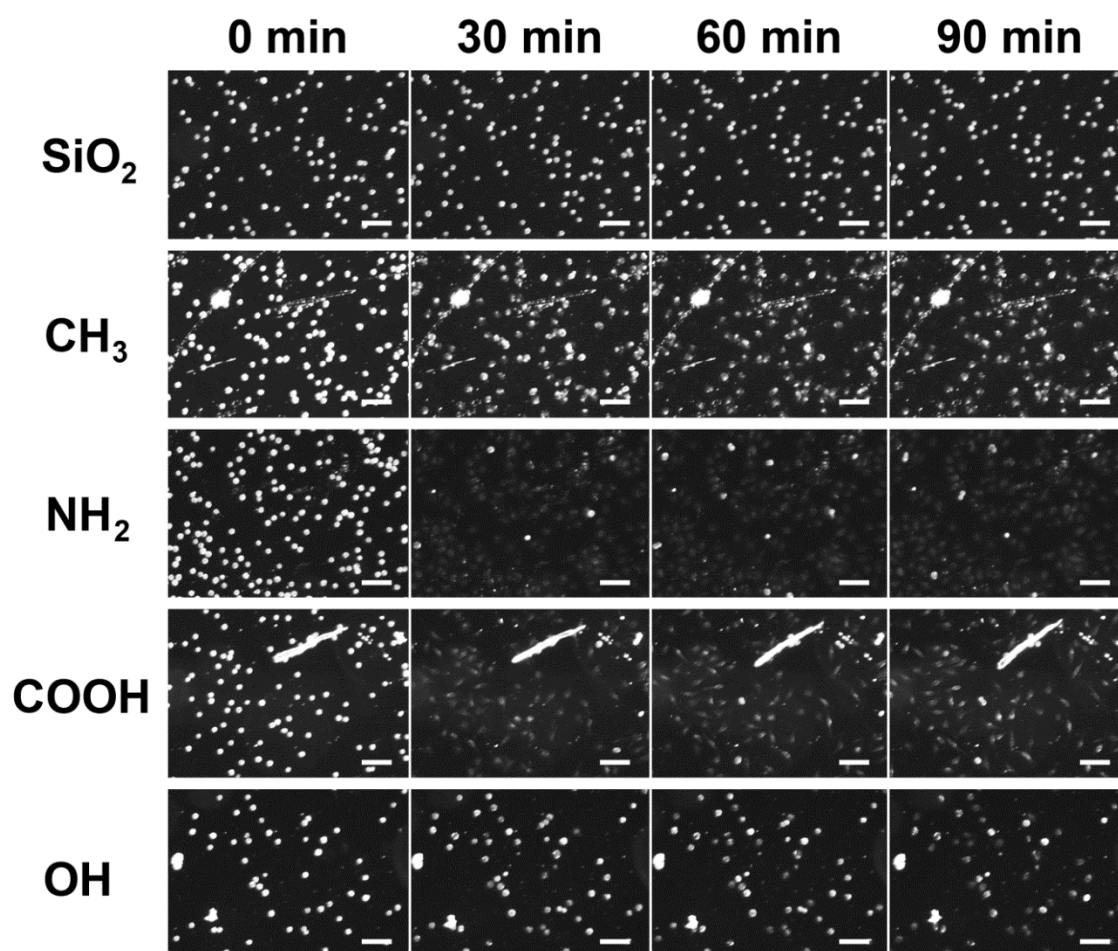

**Fig. S1.** QCM-D time-lapse images of L929 cells on substrates with different surface chemistries. (Scale bar, 100  $\mu\text{m}$ .)

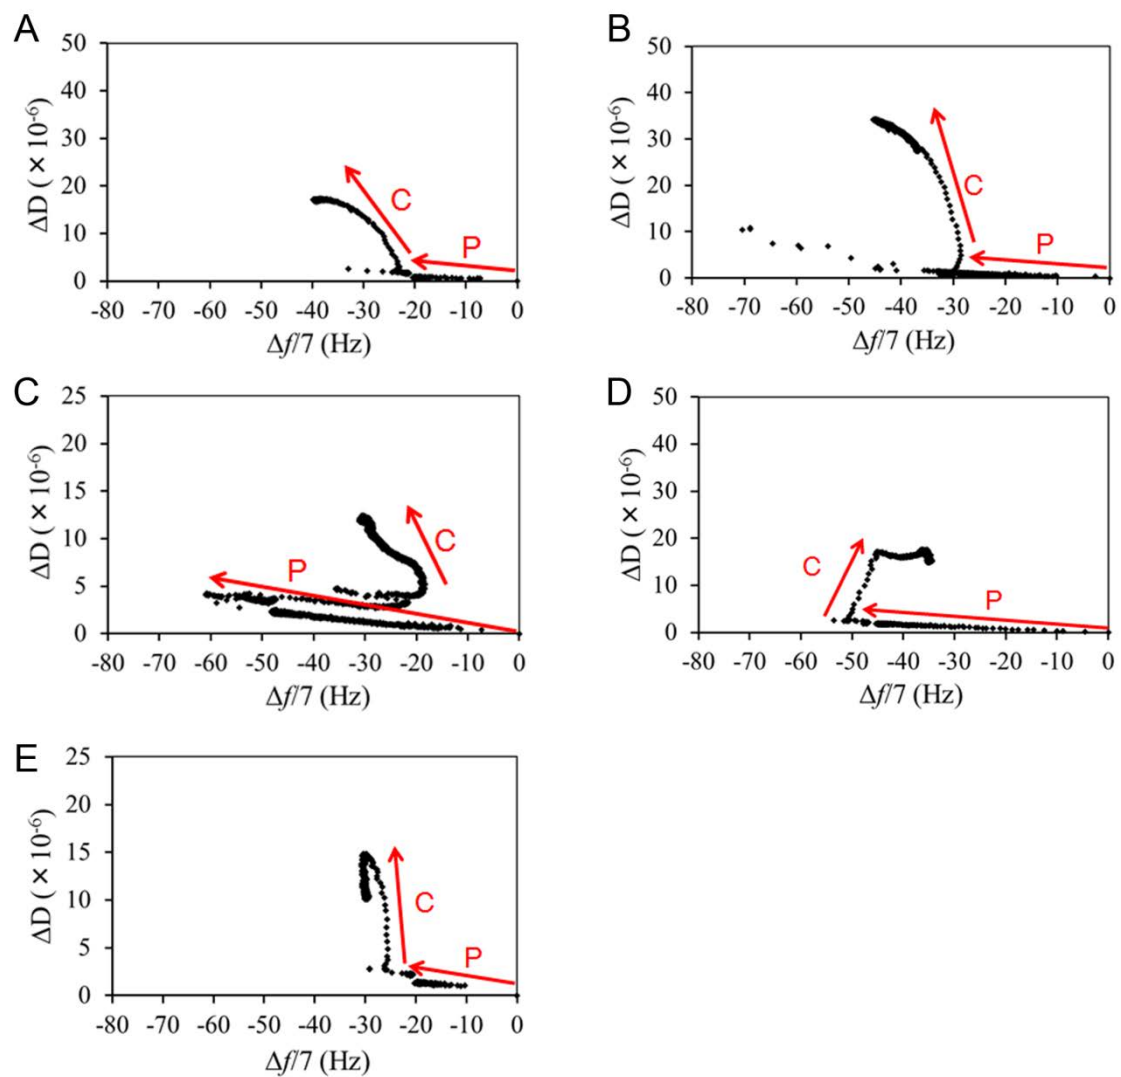

**Fig. S2.** Alternative QCM-D  $\Delta D$ - $\Delta f$  plots for (A) the CH<sub>3</sub>-SAM surface, (B) the NH<sub>2</sub>-SAM surface, (C) the SiO<sub>2</sub> surface, (D) the COOH-SAM surface and (E) the OH-SAM surface. "P" denotes the protein adsorption phase, and "C" denotes the cell adhesion phase.
